# Supplementary material
Source: Springer Nature journal article supplement (https://www.springermedizin.de/resource/supplementary/12968_2012_2574_MOESM16_ESM.pdf/9582376)

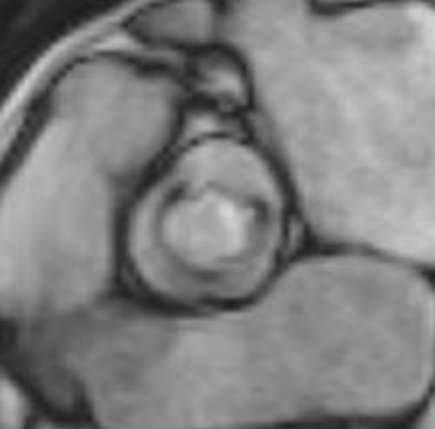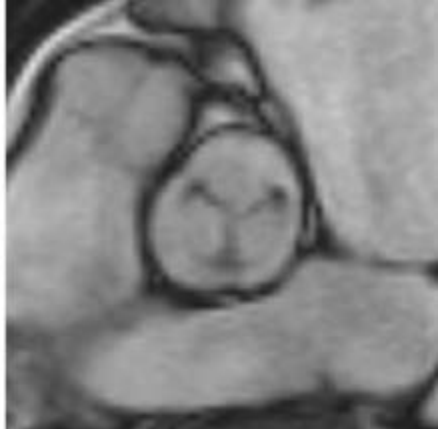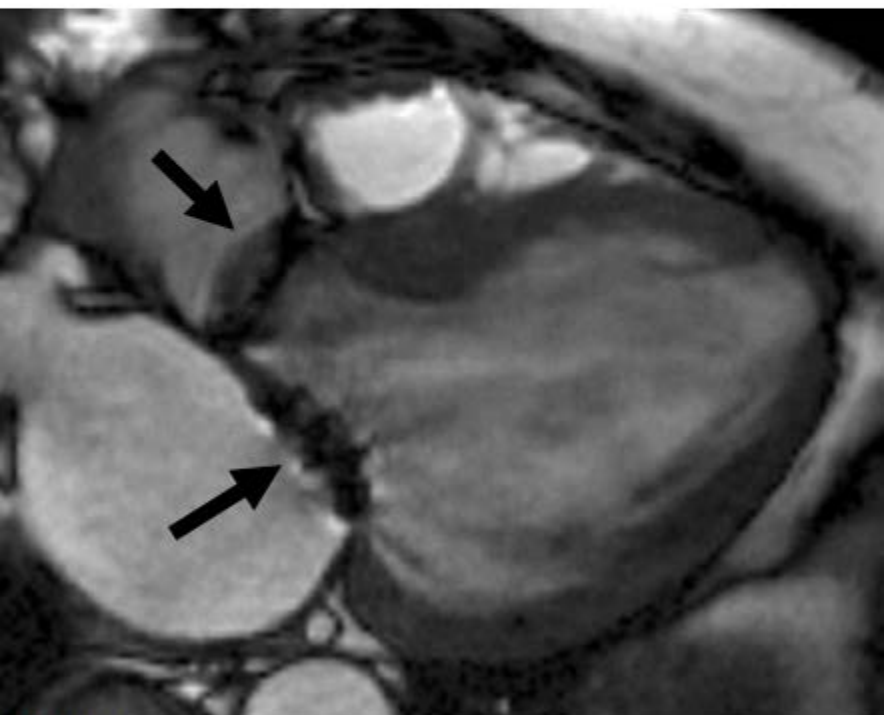

Supplement: MOESM16 [file 9582376]
